# Supplementary material
Source: Research Square preprint supplement (doi:10.21203/rs.3.rs-9168618/v1)
Supplement: Supplementary file 1 [file cc37ba909488a64e531dda77.doc]

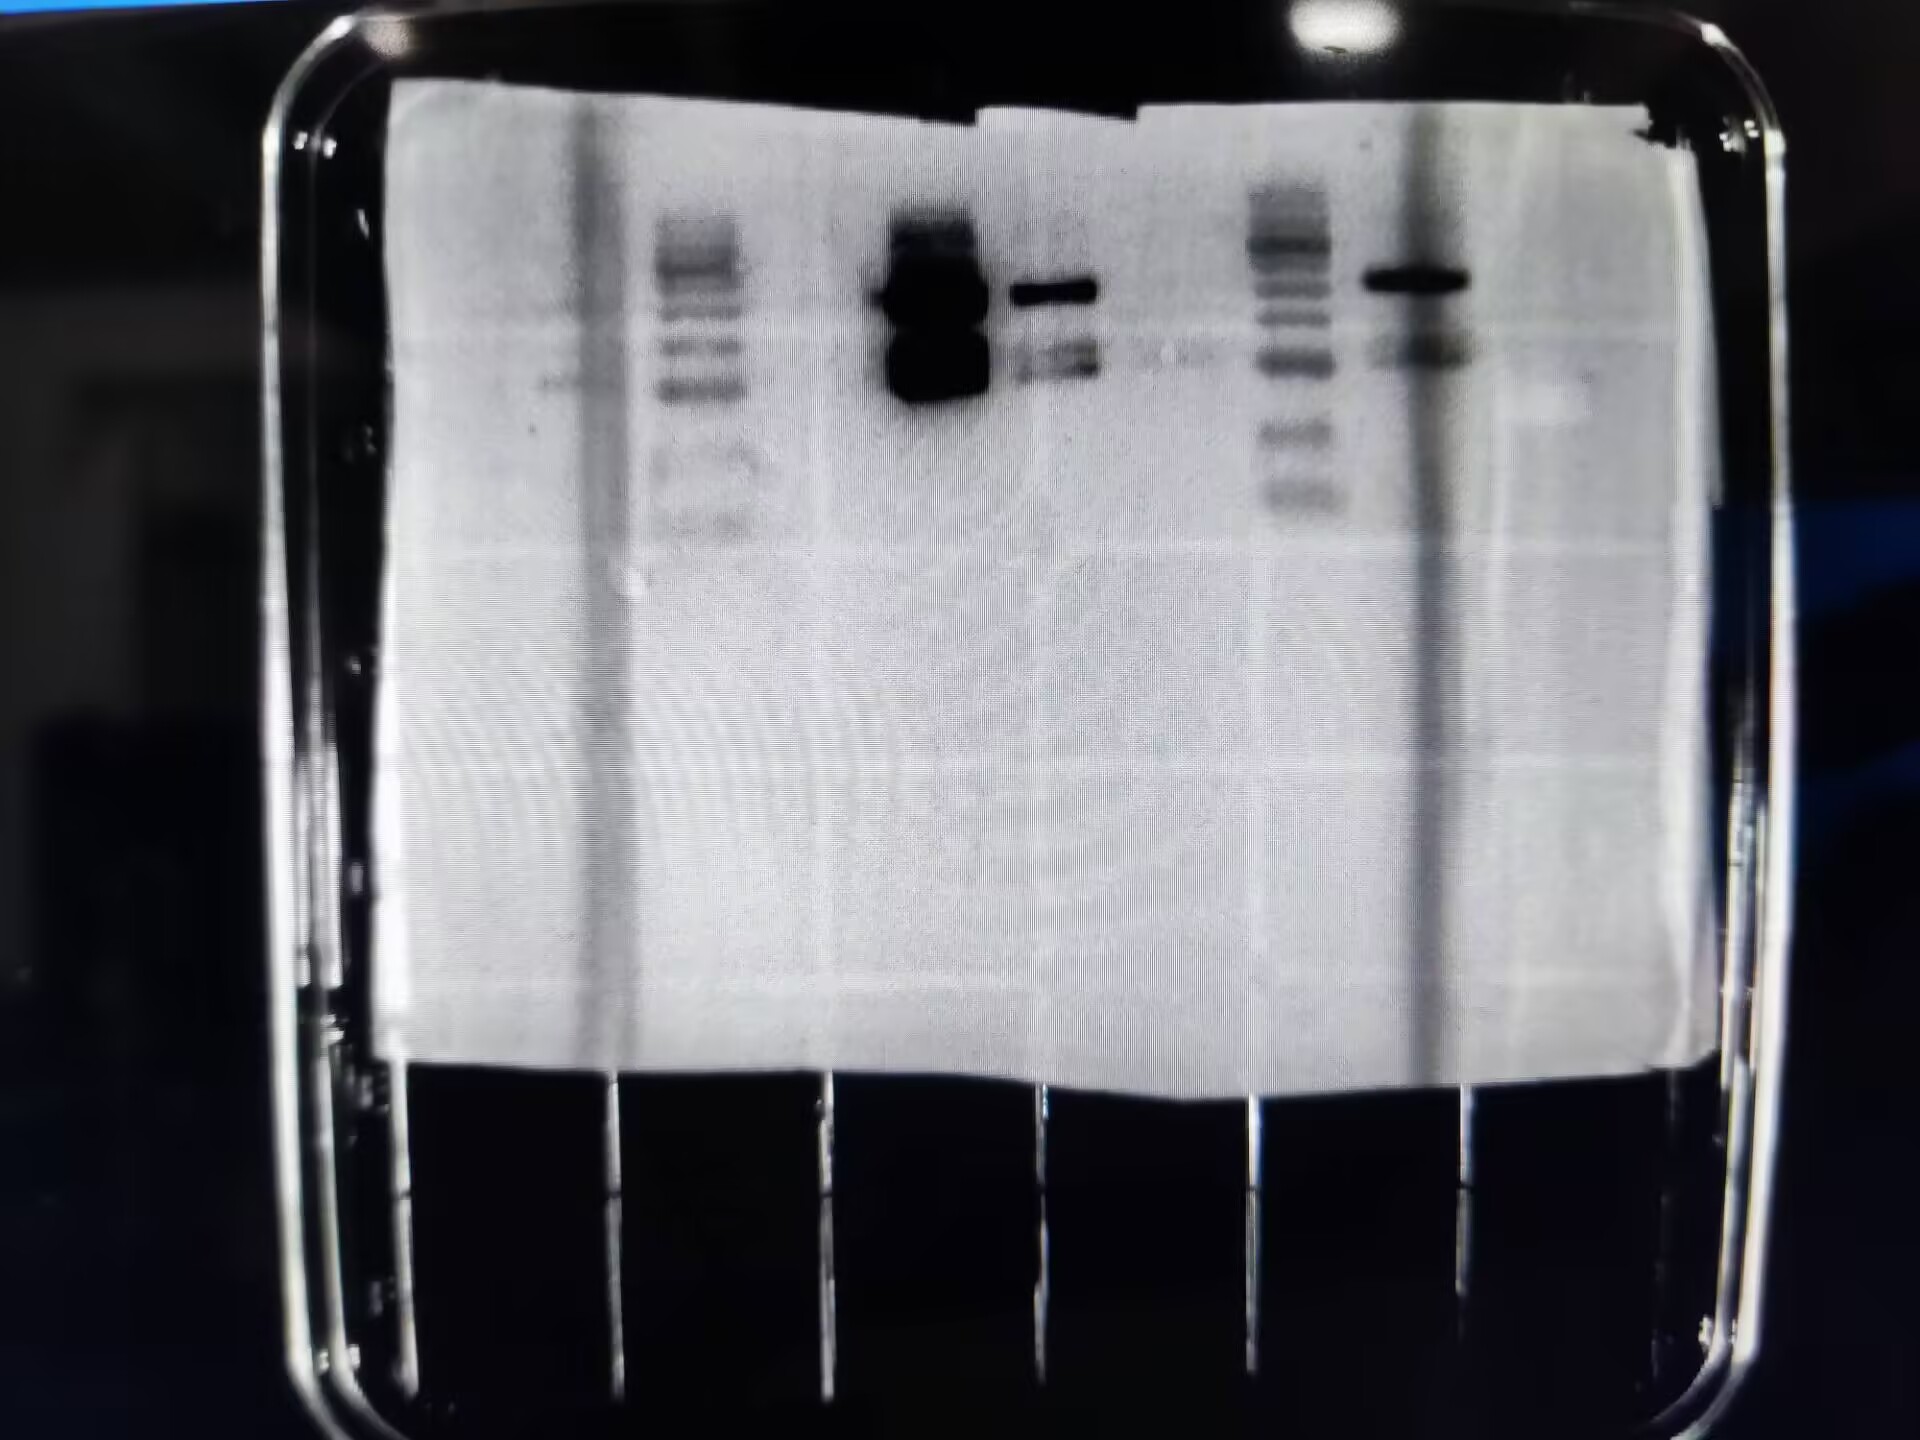


**55—**

**25—**

**17—**

**95—**

**43—**

**55—**

**25—**

**17—**

**95—**

**43—**

**M CsMYB5-GST**

b

**75—**

**34—**

**34—**

**75—**

Original Figure of Western blot. M represents the protein marker, and the red box indicates the CsMYB5-GST fusion protein.
